# Supplementary material
Source: PubMed Central journal article supplement (PMC7003302)
Supplement: ASN.2019070676SupplementaryData.pdf [file ASN.2019070676SupplementaryData.pdf]

## Supplemental Material

Cortazar *et al.* Clinical Features and Outcomes of Immune Checkpoint Inhibitor-associated AKI: a multicenter study

### Table of Contents

|                              |                                                                                                    |
|------------------------------|----------------------------------------------------------------------------------------------------|
| <b>Supplemental Appendix</b> | Data collected on cases                                                                            |
| <b>Supplemental Table 1</b>  | List of Collaborating institutions                                                                 |
| <b>Supplemental Table 2</b>  | ICPi initiation by year, cases vs. controls                                                        |
| <b>Supplemental Table 3</b>  | Baseline characteristics of biopsied and non-biopsied patients with ICPi-AKI                       |
| <b>Supplemental Table 4</b>  | Risk factors for ICPi-AKI among biopsied patients                                                  |
| <b>Supplemental Table 5</b>  | Concomitant chemotherapeutic nephrotoxins                                                          |
| <b>Supplemental Table 6</b>  | Histologic features of biopsied patients with TIN                                                  |
| <b>Supplemental Table 7</b>  | Treatment of ICPi-AKI, stratified by biopsy status                                                 |
| <b>Supplemental Table 8</b>  | Clinical features of patients receiving immunosuppression in addition to steroids ( $n=11$ )       |
| <b>Supplemental Table 9</b>  | Odds ratios for complete renal recovery according to concomitant potential TIN-causing medications |
| <b>Supplemental Table 10</b> | Odds ratios for complete renal recovery according to histologic features in patients with TIN      |
| <b>Supplemental Figure 1</b> | Clinical features of ICPi-AKI in biopsied patients with TIN                                        |
| <b>Supplemental Figure 2</b> | Clinical features of ICPi-AKI in patients with and without biopsy-proved TIN                       |
| <b>Supplemental Figure 3</b> | Renal recovery following ICPi-AKI among biopsied versus non-biopsied patients                      |
| <b>Supplemental Figure 4</b> | Factors associated with renal recovery following ICPi-AKI among biopsied patients.                 |
| <b>Supplemental Figure 5</b> | Renal recovery status predicts overall survival in biopsied-only patients                          |

## **Supplemental Appendix – Data collected on cases**

Data collected from each case included age; gender; race; comorbidities, including pre-existing autoimmune disease; baseline serum creatinine (SCr), defined as the value immediately preceding initiation of ICPI therapy; malignancy type; ICPI regimen; occurrence of extrarenal immune-related adverse events (irAEs) prior to or concomitant with ICPI-AKI; concomitant use of tubulointerstitial nephritis-causing medications, including proton pump inhibitors, antibiotics, and nonsteroidal anti-inflammatory drugs within 2 weeks preceding the diagnosis of ICPI-AKI; longitudinal SCr values; urinalysis, urine microscopy, and quantification of proteinuria at the time of AKI; need for renal replacement therapy; glucocorticoid regimen; alternative immunosuppressants administered; and survival status at last follow-up. We also collected pathology reports from all patients who underwent a kidney biopsy. We classified the degree of interstitial fibrosis/tubular atrophy and glomerulosclerosis as none/mild (0-25%), moderate (26-50%), or severe (>50%). We also collected data on the presence of granulomatous features and tissue eosinophilia. Patients were considered to have tissue eosinophilia if the pathologist noted that eosinophils comprised a prominent component of the interstitial infiltrate.

| <b>Collaborating Institution (# patients contributed)</b>      |                     |
|----------------------------------------------------------------|---------------------|
| Brigham and Women's Hospital/Dana Farber Cancer Institute (14) | Boston, MA          |
| Columbia University Medical Center (7)                         | New York, NY        |
| Duke University (6)                                            | Durham, NC          |
| Johns Hopkins University (3)                                   | Baltimore, MD       |
| Massachusetts General Hospital (13)                            | Boston, MA          |
| Mayo Clinic (11)                                               | Rochester, MN       |
| MD Anderson Cancer Center (13)                                 | Houston, TX         |
| Memorial Sloan Kettering Cancer Center (20)                    | New York, NY        |
| University of Alabama Birmingham (5)                           | Birmingham, AL      |
| University of California, Los Angeles (3)                      | Los Angeles, CA     |
| University of Miami (3)                                        | Miami, FL           |
| University of Pennsylvania (5)                                 | Philadelphia, PA    |
| University of Toronto (8)                                      | Toronto, ON         |
| University of Virginia (6)                                     | Charlottesville, VA |
| University of Washington (5)                                   | Seattle, WA         |
| Vanderbilt University (1)                                      | Nashville, TN       |
| Washington University in Saint Louis (7)                       | Saint Louis, MO     |
| Yale University (8)                                            | New Haven, CT       |

**Supplemental Table 1. Collaborating institutions.** Eighteen total institutions contributed to patients to the study.

| <b>Year of ICPI initiation</b> | <b>Cases (n=138)</b> | <b>Control (n=276)</b> |
|--------------------------------|----------------------|------------------------|
| 2011-2012                      | 10 (7.2)             | 4 (1.4)                |
| 2013-2014                      | 17 (12.3)            | 20 (7.2)               |
| 2015-2016                      | 45 (32.6)            | 144 (52.2)             |
| 2017-2018                      | 66 (47.8)            | 108 (39.1)             |

**Supplemental Table 2. ICPI initiation by year, cases vs. controls**

| Variable                             | Biopsied<br>(n=60) | Non-biopsied<br>(n=78) | P Value |
|--------------------------------------|--------------------|------------------------|---------|
| Age at ICPI initiation (yrs)         | 64 (58-73)         | 69 (60-75)             | 0.047   |
| Female, n (%)                        | 21 (35)            | 34 (44)                | 0.38    |
| Race, n (%)                          |                    |                        | 0.90    |
| White                                | 50 (83)            | 66 (85)                |         |
| Black                                | 4 (7)              | 6 (8)                  |         |
| Asian                                | 1 (2)              | 2 (3)                  |         |
| Comorbidities, n (%)                 |                    |                        |         |
| Hypertension                         | 30 (50)            | 47 (60)                | 0.30    |
| Diabetes                             | 9 (15)             | 14 (18)                | 0.82    |
| CHF                                  | 0 (0)              | 3 (4)                  | 0.26    |
| COPD                                 | 2 (3)              | 4 (5)                  | 0.70    |
| Cirrhosis                            | 0 (0)              | 2 (2.6)                | 0.51    |
| Baseline SCr (mg/dL)                 | 0.94 (0.80-1.34)   | 0.91 (0.80-1.20)       | 0.34    |
| Baseline eGFR (ml/min)               | 74 (55-91)         | 72 (55-88)             | 0.92    |
| CKD, n (%)                           | 19 (32)            | 25 (32)                | 1.00    |
| CKD IV, n (%)                        | 4 (7)              | 5 (6)                  | 1.00    |
| Autoimmune Disease, n (%)            | 11 (18)            | 6 (8)                  | 0.07    |
| Malignancy, n (%)                    |                    |                        | 0.88    |
| Melanoma                             | 20 (33)            | 29 (37)                |         |
| Lung                                 | 15 (25)            | 21 (27)                |         |
| Genitourinary                        | 10 (17)            | 13 (17)                |         |
| Other                                | 15 (25)            | 15 (19)                |         |
| Proton pump inhibitor, n (%)         | 33 (55)            | 42 (54)                | 1.00    |
| ICPi <sup>1</sup> , n (%)            |                    |                        |         |
| Anti-CTLA-4                          | 19 (32)            | 25 (32)                | 1.00    |
| Anti-PD-1                            | 56 (93)            | 71 (91)                | 0.76    |
| Anti-PD-L1                           | 5 (8)              | 5 (6)                  | 0.75    |
| Combo anti-CTLA-4 + anti-PD-1/ PD-L1 | 18 (30)            | 21 (27)                | 0.71    |

**Supplemental Table 3. Baseline characteristics of biopsied and non-biopsied patients with ICPI-AKI.** <sup>1</sup>Denotes all ICPIs ever received. Abbreviations: Combo, combination; CTLA-4, cytotoxic T-lymphocyte-associated protein 4; ICPI, immune checkpoint inhibitor; PD-1, programmed cell death 1; PD-L1, programmed death-ligand 1; SCr, serum creatinine.

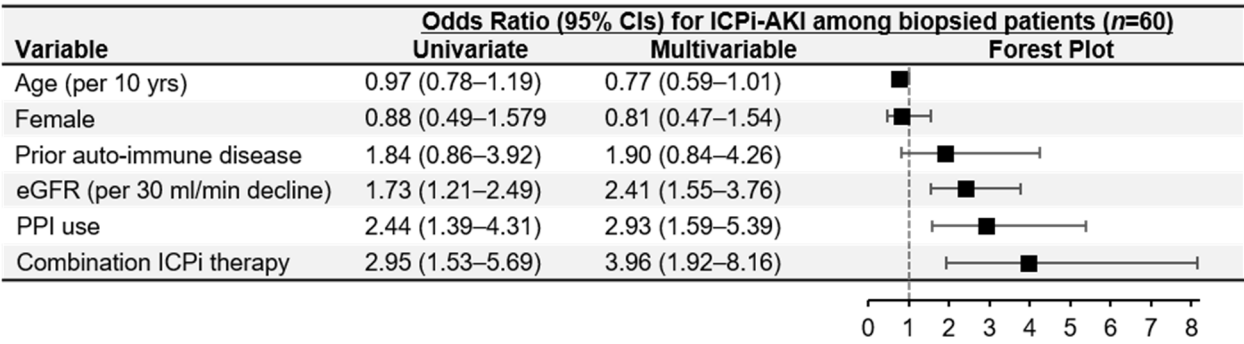

**Supplemental Table 4. Risk factors for ICPI-AKI among biopsied patients.** The multivariable model was adjusted for all covariates listed in the table. Abbreviations: ICPI, immune checkpoint inhibitor; PPI, proton pump inhibitor.

| <b>Concomitant Nephrotoxins</b> | <b><i>n</i> (%)</b> |
|---------------------------------|---------------------|
| Cisplatin                       | 0 (0)               |
| VEGF/TKI <sup>1</sup>           | 7 (5)               |
| Other <sup>2</sup>              | 2 (1)               |

**Supplemental Table 5. Concomitant chemotherapeutic nephrotoxins.** This table shows the number of patients who received cisplatin, a VEGF/TKI agent, or other potentially nephrotoxic chemotherapeutic agents with 2 weeks prior to ICPI-AKI. Data were available for the entire cohort ( $n=138$ ). <sup>1</sup>Alectinib ( $n=1$ ), bevacizumab ( $n=2$ ), bosutinib ( $n=1$ ), crizotinib ( $n=1$ ), osimertinib ( $n=1$ ), and vemurafenib ( $n=1$ ); <sup>2</sup>Carboplatin ( $n=1$ ), dabrafenib ( $n=1$ ). Abbreviations: VEGF, vascular endothelial growth factor; TKI, tyrosine kinase inhibitor.

| <b>Histologic Feature</b>                          | <b><i>n</i> (%)</b> |
|----------------------------------------------------|---------------------|
| Granulomatous Features                             | 11 (20)             |
| Tissue Eosinophilia                                | 32 (57)             |
| Interstitial Fibrosis/Tubular Atrophy <sup>1</sup> |                     |
| None/Mild                                          | 43 (80)             |
| Moderate                                           | 9 (17)              |
| Severe                                             | 2 (4)               |
| Glomerulosclerosis                                 |                     |
| None/Mild                                          | 47 (84)             |
| Moderate                                           | 5 (9)               |
| Severe                                             | 4 (7)               |

**Supplemental Table 6. Histologic features of biopsied patients with TIN. *n*=56.**

<sup>1</sup>54 patients with available data on interstitial fibrosis/tubular atrophy. Abbreviations: TIN, tubulointerstitial nephritis.



| Treatment Variable                                          | All<br>(n=119)   | Biopsied<br>(n=53) | Not Biopsied<br>(n=66) | P Value |
|-------------------------------------------------------------|------------------|--------------------|------------------------|---------|
| SCr at GC initiation (mg/dL)                                | 3.01 (2.25–4.48) | 3.19 (2.53–5.11)   | 2.81 (2.13–3.97)       | 0.13    |
| Required RRT at GC initiation, n (%)                        | 3 (3)            | 3 (6)              | 0 (0)                  | 0.09    |
| Treatment delay <sup>1</sup> (days)                         | 3 (0–8)          | 6 (2–14)           | 2 (0–6)                | <0.001  |
| Received IV pulse GC, n (%)                                 | 36 (30)          | 15 (28)            | 21 (32)                | 0.69    |
| Grams of solumedrol                                         | 1.00 (0.38–2.03) | 0.75 (0.44–1.75)   | 1.50 (0.38–2.75)       | 0.98    |
| Initial daily oral GC dose (mg of prednisone)               | 60 (60–80)       | 60 (60–61)         | 60 (60–90)             | 0.63    |
| Days at initial oral GC dose                                | 7 (5–12)         | 7 (5–12)           | 7 (5–11)               | 0.38    |
| Days at > 20 mg oral prednisone                             | 28 (16–47)       | 28 (20–47)         | 30 (14–44)             | 0.25    |
| Cumulative oral GC dose in first 2 weeks (mg of prednisone) | 780 (600–980)    | 790 (665–951)      | 780 (570–980)          | 0.50    |
| Days of oral GC                                             | 63 (32–107)      | 69 (42–102)        | 54 (28–94)             | 0.02    |
| Received non-GC immunosuppressant <sup>2</sup> , n (%)      | 11 (9)           | 7 (13)             | 4 (6)                  | 0.21    |
| Nadir SCr after treatment <sup>3</sup> (mg/dL)              | 1.40 (1.08–1.73) | 1.47 (1.09–1.81)   | 1.39 (1.05–1.64)       | 0.39    |

**Supplemental Table 7. Treatment of ICPI-AKI, stratified by biopsy status.** Data are shown as median (interquartile range) and *n* (%). <sup>1</sup>Denotes time from doubling of SCr to initiation of GCs. <sup>2</sup>Non-GC immunosuppression included mycophenolate mofetil (*n*=7), rituximab (*n*=2), cyclophosphamide (*n*=1), and eculizumab (*n*=1). <sup>3</sup>Defined as the lowest value achieved within 3 months following the AKI episode (excluding values obtained during RRT). Abbreviations: GC, glucocorticoids; RRT, renal replacement therapy; SCr, serum creatinine.

| Age/<br>Sex | Cancer Type           | ICPi<br>Regimen        | Biopsy<br>Findings | Alternative<br>Immuno-<br>suppression | Renal Recovery<br>Status | 6 Month<br>Survival<br>Status |
|-------------|-----------------------|------------------------|--------------------|---------------------------------------|--------------------------|-------------------------------|
| 58F         | GBM                   | Pembro                 |                    | MMF                                   | Partial                  | Deceased                      |
| 64F         | Liver                 | Nivo                   |                    | Rituximab                             | Complete                 | Alive                         |
| 75M         | Melanoma              | Ipi+Nivo               | TIN                | MMF                                   | Partial                  | Deceased                      |
| 41M         | Squamous<br>cell lung | Nivo                   | Pauci-Immune<br>GN | Rituximab                             | Complete                 | Deceased                      |
| 51F         | Melanoma              | Ipi+Nivo+<br>Pembro    | TIN                | MMF, Infliximab                       | Partial                  | Alive                         |
| 57M         | Melanoma              | Ipi+Nivo               | Anti-GBM GN        | Cyclophosphamide                      | None                     | Alive                         |
| 54M         | Squamous<br>cell lung | Pembro                 |                    | MMF                                   | Complete                 | Alive                         |
| 56F         | Melanoma              | Pembro +<br>Durvalumab |                    | Plasma Exchange,<br>Eculizumab        | Partial                  | Deceased                      |
| 63M         | RCC                   | Nivo                   | TIN                | MMF                                   | Partial                  | Alive                         |
| 66M         | RCC                   | Nivo                   | TIN                | MMF                                   | Partial                  | Alive                         |
| 63M         | Melanoma              | Nivo                   | TIN                | MMF                                   | Partial                  | Alive                         |

**Supplemental Table 8. Clinical features of patients receiving immunosuppression in addition to steroids (n=11).** Patients with glomerular disease received the immunosuppressant as initial therapy concomitantly with steroids, while patients with biopsy-proven or suspected TIN received the immunosuppressant for resistant disease. Abbreviations: F, female; GBM, glioblastoma multiforme; GC, glucocorticoids; GN, glomerulonephritis; Ipi, Ipilimumab; M, male; MMF, mycophenolate mofetil; Nivo, Nivolumab; Pembro, Pembrolizumab; RCC, renal cell carcinoma; TIN, tubulointerstitial nephritis.

| <b>Drug</b> | <b>Univariate Odds Ratio (95% CI)</b> |
|-------------|---------------------------------------|
| Antibiotic  | 1.87 (0.59–5.90)                      |
| NSAID       | 2.02 (0.89–4.58)                      |
| PPI         | 1.14 (0.58–2.27)                      |

**Supplemental Table 9. Odds ratios for complete renal recovery according to concomitant potential TIN-causing medications.** Abbreviations: NSAID, nonsteroidal anti-inflammatory drug; PPI, proton pump inhibitor; TIN, tubulointerstitial nephritis.

| <b>Histologic Feature</b>       | <b>Univariate Odds Ratio (95% CI)</b> |
|---------------------------------|---------------------------------------|
| Granulomatous TIN               | 1.73 (0.46-6.56)                      |
| Tissue Eosinophilia             | 1.01 (0.34-2.98)                      |
| Moderate/Severe IFTA            | 0.47 (0.12-1.74)                      |
| Moderate/Severe GS <sup>1</sup> | 1.69 (0.40-7.10)                      |

**Supplemental Table 10. Odds ratios for complete renal recovery according to histologic features in patients with TIN.** <sup>1</sup>Sum of global and segmental glomerulosclerosis. Abbreviations: GS, glomerulosclerosis; IFTA, interstitial fibrosis and tubular atrophy.

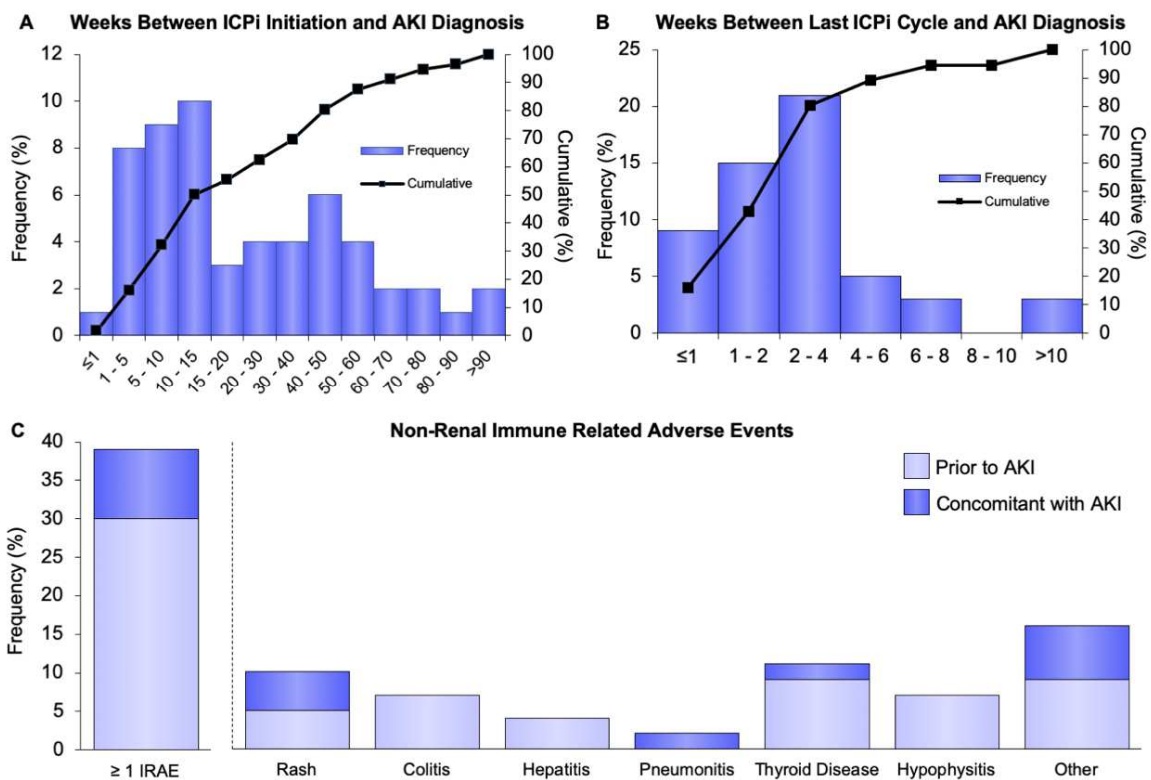

**Supplemental Figure 1. Clinical features of ICPI-AKI in patients with biopsy-proven TIN (n=56).**

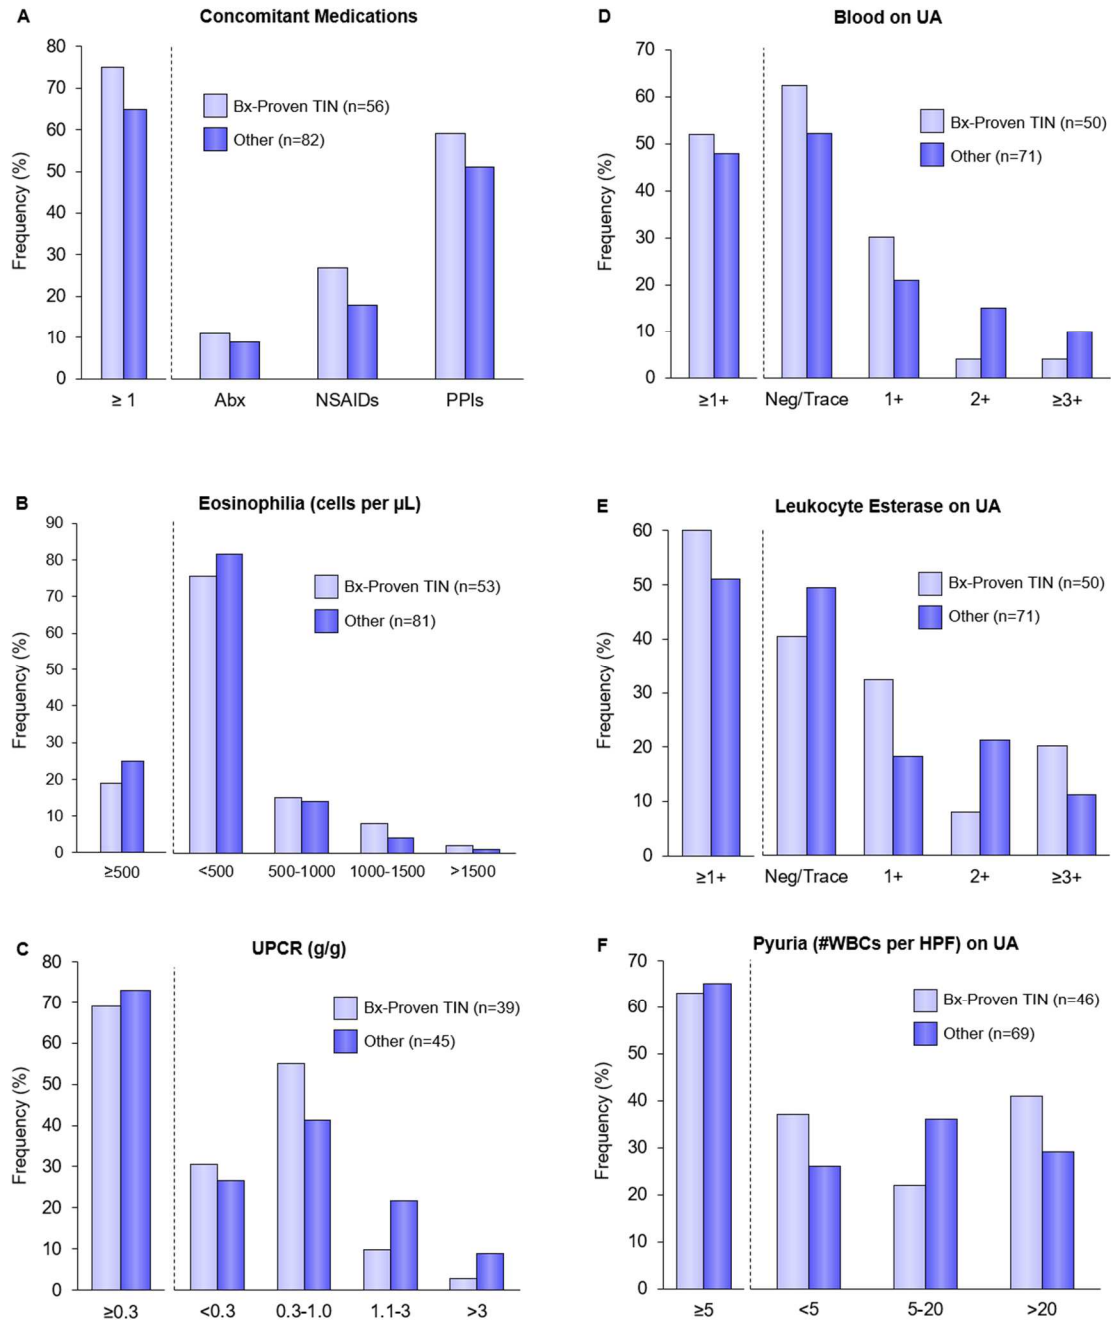

**Supplemental Figure 2. Clinical features of ICPI-AKI in patients with and without biopsy-proven TIN.** Panel A shows the frequency of concomitant potential TIN-causing medications taken within two weeks preceding ICPI-AKI in patients with and without biopsy-proven TIN. Panels B, C, D, E, and F show the distribution of eosinophilia, proteinuria, hematuria, leukocyte esterase, and pyuria, respectively, in patients with and without biopsy-proven TIN. For all analyses, chi-square testing demonstrated similar distributions between biopsy-proven vs. non-biopsy-proven TIN. Abbreviations: Abx, antibiotic; Bx, biopsy; HPF, high-power field; NSAIDs, nonsteroidal anti-inflammatory drugs; PPIs, proton pump inhibitors; TIN, tubulointerstitial nephritis; UA, urinalysis; UPCR, urine protein-to-creatinine ratio; WBCs, white blood cells.

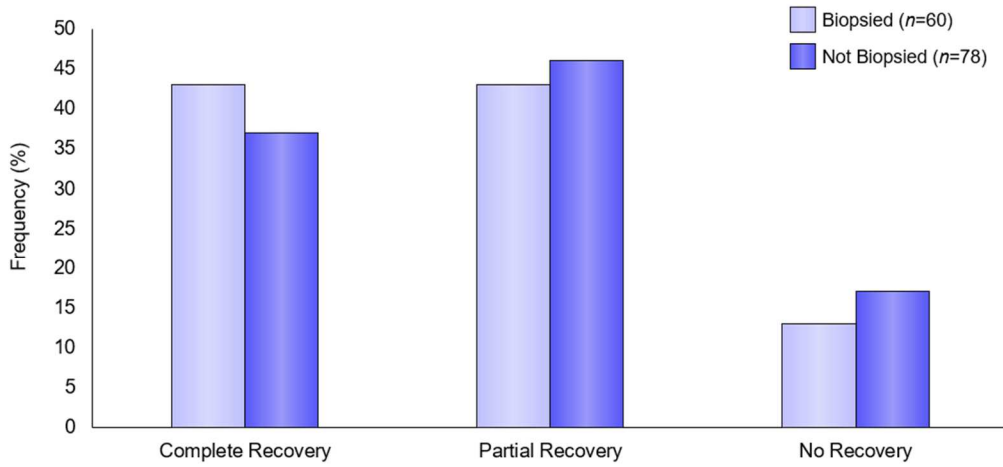

**Supplemental Figure 3. Renal recovery following ICPI-AKI among biopsied versus non-biopsied patients.** The frequency of complete, partial, and no renal recovery following an episode of ICPI-AKI was similar in biopsied versus non-biopsied patients.

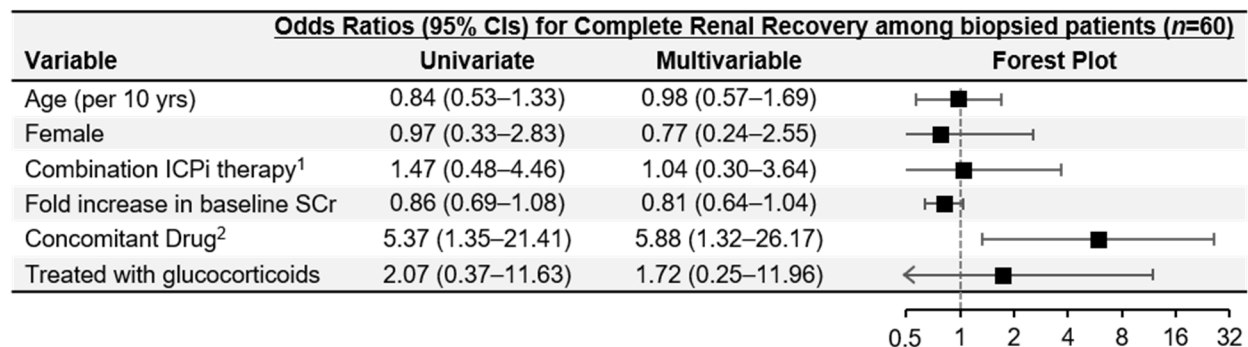

**Supplemental Figure 4. Factors associated with renal recovery following ICPI-AKI among biopsied patients.** Univariate and multivariable adjusted odds ratios (and 95% CIs) for achievement of complete renal recovery in biopsied patients only (n=60). <sup>1</sup>Combination ICPI therapy refers to treatment with both an anti-CTLA-4 and an anti-PD-1/PD-L1 antibody. <sup>2</sup>Refers to concomitant use of potential TIN-causing medications, including antibiotics, NSAIDs, and PPIs within 2 weeks prior to the diagnosis of ICPI-AKI. Concomitant irAE with AKI was not included in the model due to being a perfect predictor of failure to achieve complete renal recovery among biopsied patients. Abbreviations: CI, confidence interval; CTLA-4, cytotoxic T-lymphocyte-associated protein 4; irAE, immune-related adverse event; NSAID, nonsteroidal anti-inflammatory drug; PD-1, programmed cell death 1 protein; PD-L1, programmed death-ligand 1; PPI, proton pump inhibitor; RRT, renal replacement therapy; SCr, serum creatinine.



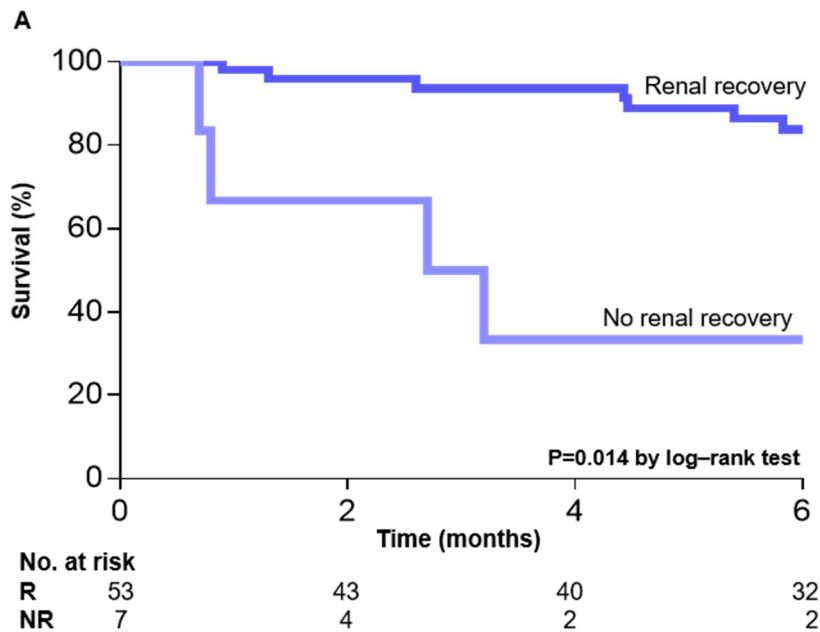

**B**

| Variable            | Hazard Ratio (95% CIs) for Survival following AKI |                   |             |
|---------------------|---------------------------------------------------|-------------------|-------------|
|                     | Univariate                                        | Multivariable     | Forest Plot |
| Age (per 10 yrs)    | 0.99 (0.69–1.41)                                  | 1.02 (0.70–1.47)  |             |
| Female              | 0.67 (0.27–1.68)                                  | 0.76 (0.29–1.98)  |             |
| eGFR <sup>1</sup>   | 0.84 (0.51–1.37)                                  | 0.73 (0.41–1.30)  |             |
| Stage 3 AKI         | 1.10 (0.45–2.70)                                  | 1.33 (0.47–3.75)  |             |
| Non-recovery of AKI | 3.67 (1.21–11.12)                                 | 3.91 (1.22–12.59) |             |

0 1 2 3 4 5 6

**Supplemental Figure 5. Renal recovery status predicts overall survival in biopsied-only patients (n=60).** Panel A shows Kaplan-Meier 6-month survival curves, stratified by renal recovery status, starting at the time of development of ICPI-AKI. Panels B shows univariate and multivariable adjusted hazard ratios for 6-month mortality. <sup>1</sup>Refers to per 30 ml/min/1.73m<sup>2</sup> decline. Abbreviations: NR, no recovery; R, recovery.
